# Supplementary material for: Hierarchical porous carbon derived from coal tar pitch by one step carbonization and activation combined with a CaO template for supercapacitors
Source: Royal Society of Chemistry journal article supplement (doi:10.1039/d2nj00433j), 2022-01-01
Supplement: d2nj00433j1.pdf [file d2nj00433j1.pdf]

## Supporting Information

### Hierarchical porous carbon derived from coal tar pitch by one step carbonization and activation combined with CaO template for supercapacitor

*Yuchen Jiang, Zhifeng He, Xin Cui, Zeyi Liu, Jiafeng Wan, Yifu Liu and Fangwei Ma\**

Key Laboratory of Functional Inorganic Material Chemistry, Ministry of Education of China. Key Laboratory of Chemical Engineering Processes & Technology for High-efficiency Conversion (College of Heilongjiang Province), School of Chemistry and Material Science. Heilongjiang University, Harbin, 150080, China.

\*Email: fangwei\_ma@hotmail.com.

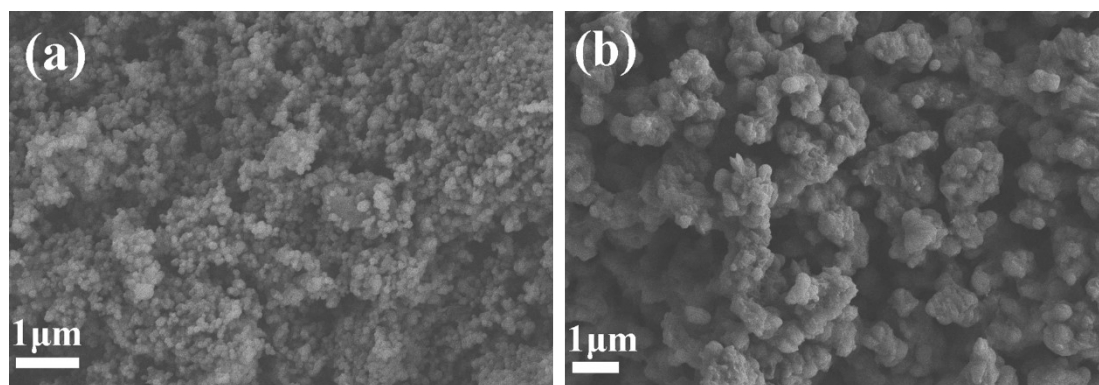

**Fig. S1** The SEM images of (a) commercial  $\text{CaCO}_3$  and (b)  $\text{CaO}$ .

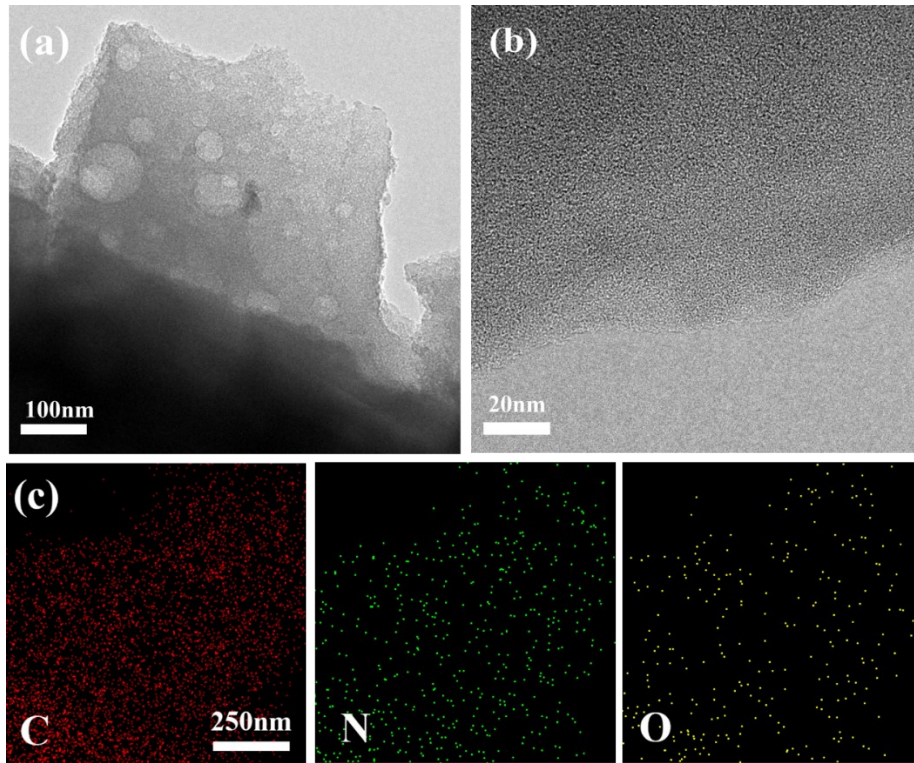

**Fig. S2** (a) TEM image, (b) HRTEM image and (c) mapping images for C, N and O elements of HPCs-0.5-700-2.

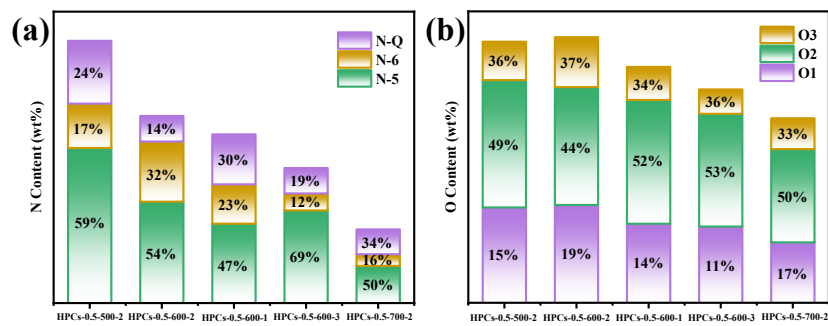

**Fig. S3** Various types of N (a) and O (b) proportion comparison of the samples.

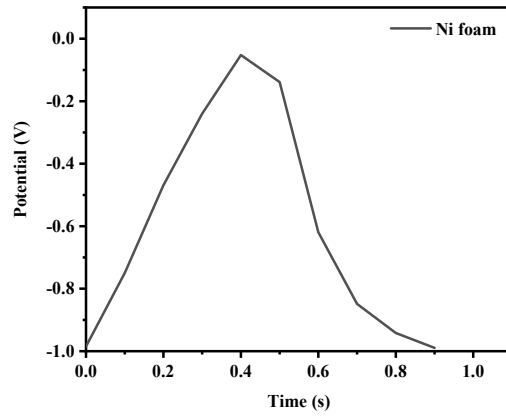

**Fig. S4** the GCD curves of Ni foam at  $1 \text{ A g}^{-1}$  in three-electrode system.

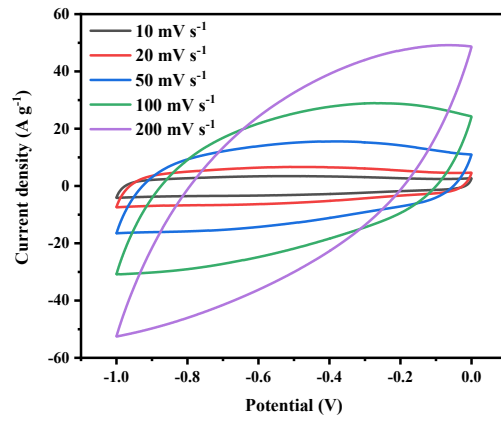

**Fig. S5** the CV curves of HPCs-0.5-600-2 at different scan rate in three-electrode system.

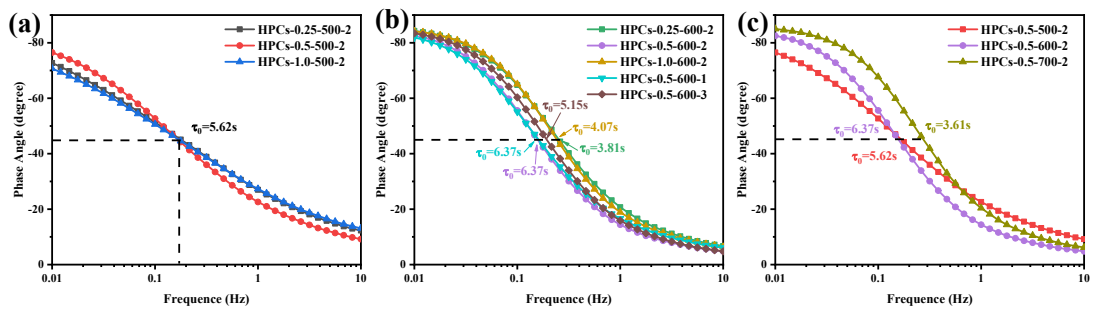

**Fig. S6** (a, b and c) the Bode plots of all HPCs electrodes.

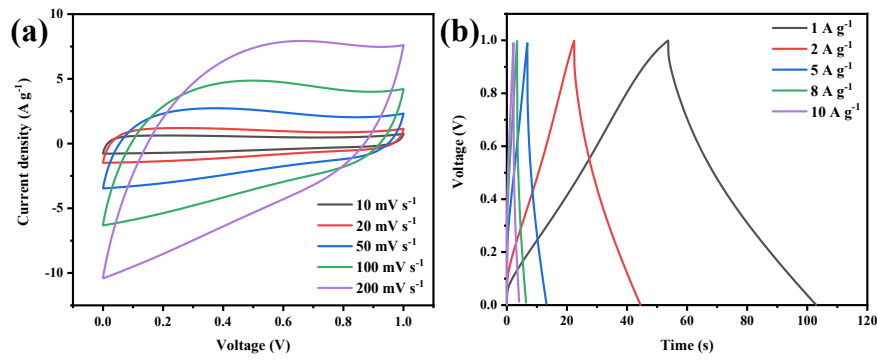

**Fig. S7** (a) the CV curves at different scan rate and (b) the GCD curves at different current density of HPCs-0.5-600-2 in two-electrode system.

**Table S1** The C, N and O contents of samples obtained from XPS analysis.

| Samples        | C (wt %) | N (wt %) | O (wt %) |
|----------------|----------|----------|----------|
| HPCs-0.5-500-2 | 81.28    | 1.71     | 17.02    |
| HPCs-0.5-600-2 | 81.46    | 1.22     | 17.32    |
| HPCs-0.5-600-1 | 83.51    | 1.1      | 15.38    |
| HPCs-0.5-600-3 | 85.21    | 0.88     | 13.91    |
| HPCs-0.5-700-2 | 87.5     | 0.48     | 12.03    |

**Table S2** The equivalent series resistance ( $R_s$ ) values and the charge transfer resistance ( $R_{ct}$ )

values of different electrodes.

| Samples         | $R_s$ ( $\Omega$ ) | $R_{ct}$ ( $\Omega$ ) |
|-----------------|--------------------|-----------------------|
| HPCs-0.25-500-2 | 0.79               | 1.19                  |
| HPCs-0.5-500-2  | 0.75               | 1.05                  |
| HPCs-1.0-500-2  | 0.80               | 1.43                  |
| HPCs-0.25-600-2 | 0.70               | 0.55                  |
| HPCs-0.5-600-2  | 1.13               | 0.71                  |
| HPCs-1.0-600-2  | 0.74               | 0.57                  |

---

|                |      |      |
|----------------|------|------|
| HPCs-0.5-600-1 | 0.95 | 0.86 |
| HPCs-0.5-600-3 | 1.03 | 0.53 |
| HPCs-0.5-700-2 | 0.77 | 0.39 |

---
